# Supplementary material for: Facile synthesis and screen printing of dual-mode luminescent NaYF4:Er,Yb (Tm)/carbon dots for anti-counterfeiting applications
Source: Royal Society of Chemistry journal article supplement (doi:10.1039/c7tc01585b), 2017-01-01
Supplement: c7tc01585b1.pdf [file c7tc01585b1.pdf]

## Supporting Information

# Facile Synthesis and Screen Printing Dual-mode Luminescent Material of NaYF<sub>4</sub>: Er, Yb (Tm) /Carbon Dots for Anti-Counterfeiting Applications

*Mengxiao Li, Weijing Yao, Jun Liu, Qingyong Tian, Li Liu, Jin Ding, Qingwen Xue, Qiang Lu and Wei*

*Wu\**

Laboratory of Printable Functional Nanomaterials and Printed Electronics, School of Printing and  
Packaging, Wuhan University, Wuhan 430072, P. R. China

Email address:

Wei Wu: [weiwu@whu.edu.cn](mailto:weiwu@whu.edu.cn) (Corresponding author)

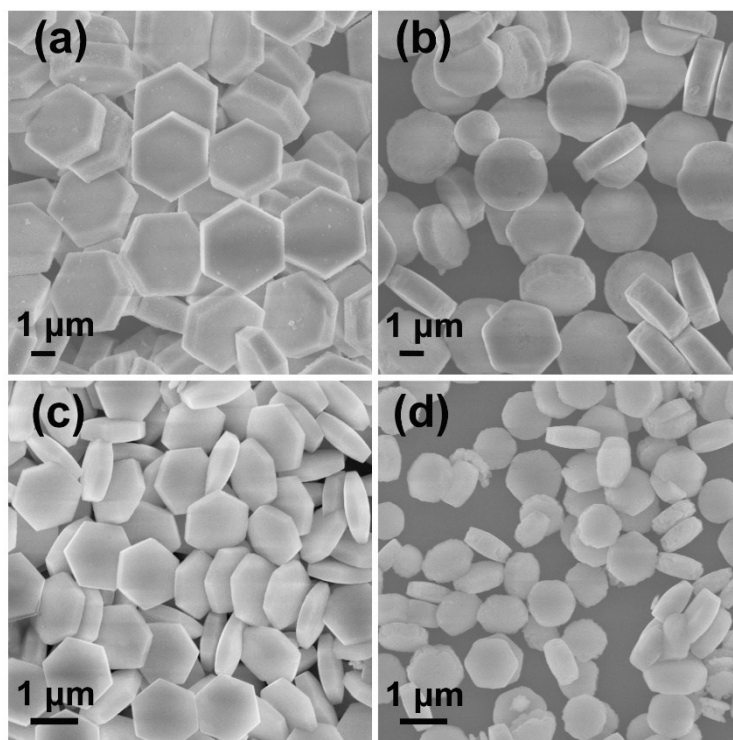

**Figure S1** SEM images of NaYF<sub>4</sub>: Yb<sup>3+</sup> 50%, Er<sup>3+</sup> 2% UCMPs (a), NaYF<sub>4</sub>: Tm<sup>3+</sup> 2%, Er<sup>3+</sup> 10% UCMPs (c), and corresponding images of UCMPs/CDs (b, d), respectively.

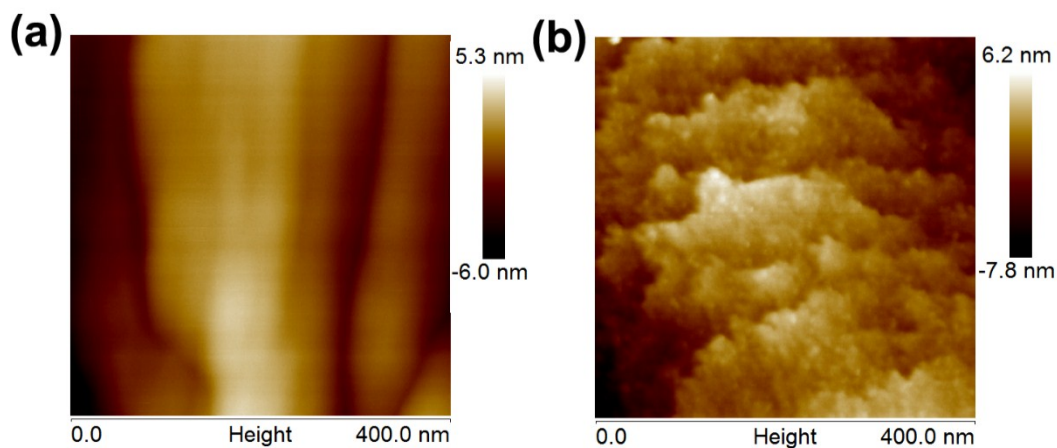

**Figure S2** AFM images of NaYF<sub>4</sub>: Yb<sup>3+</sup> 18%, Er<sup>3+</sup> 2% UCMPs (a), NaYF<sub>4</sub>: Yb<sup>3+</sup> 18%, Er<sup>3+</sup> 2% UCMPs/CDs (b).

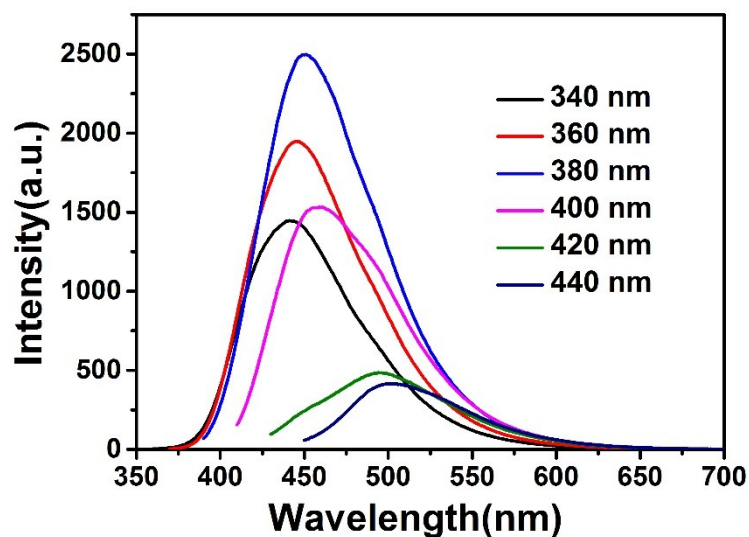

**Figure S3** The fluorescent spectra of CDs solution.

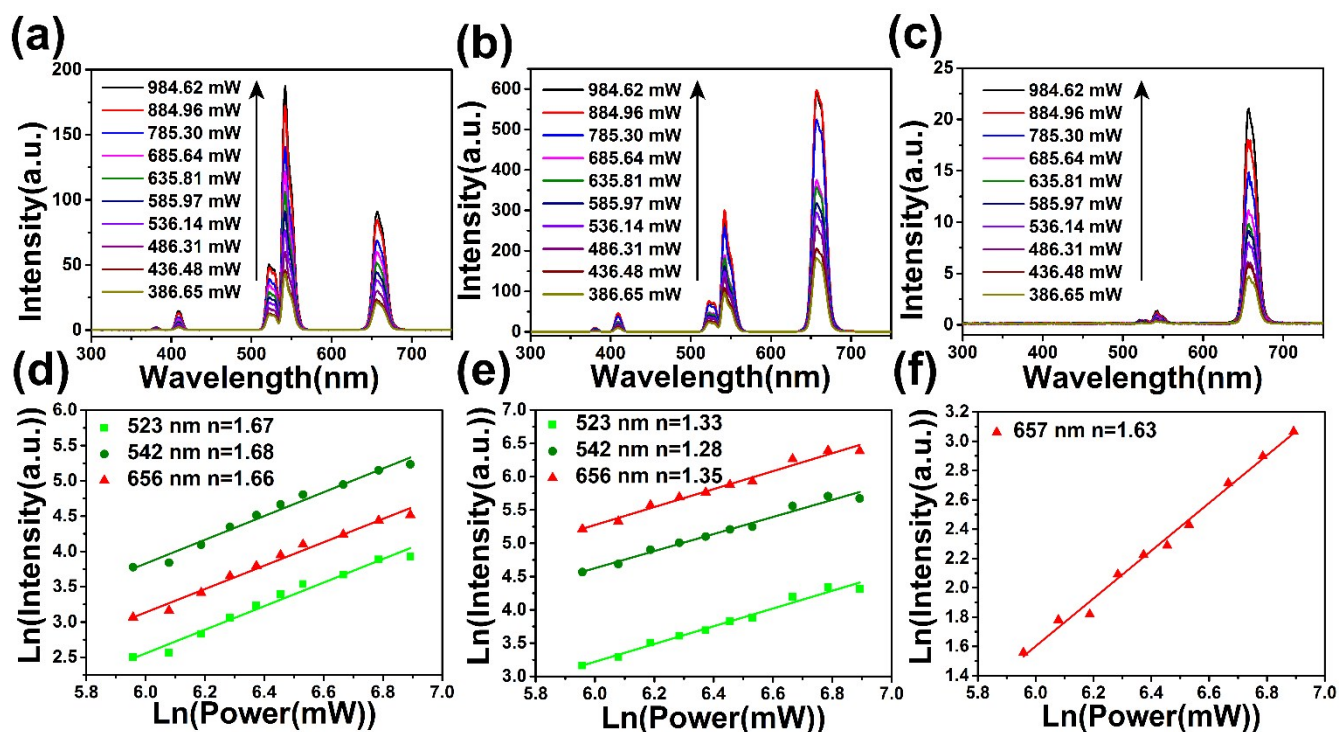

**Figure S4** The UC luminescent intensity of naked UCMPs in NaYF<sub>4</sub>:Yb<sup>3+</sup> 18%, Er<sup>3+</sup> 2% (a), NaYF<sub>4</sub>:Yb<sup>3+</sup> 50%, Er<sup>3+</sup> 2% (b), and NaYF<sub>4</sub>:Tm<sup>3+</sup> 2%, Er<sup>3+</sup> 10% (c); the corresponding laser power dependence of the emission of naked UCMPs under the 980nm laser excitation (d-f).

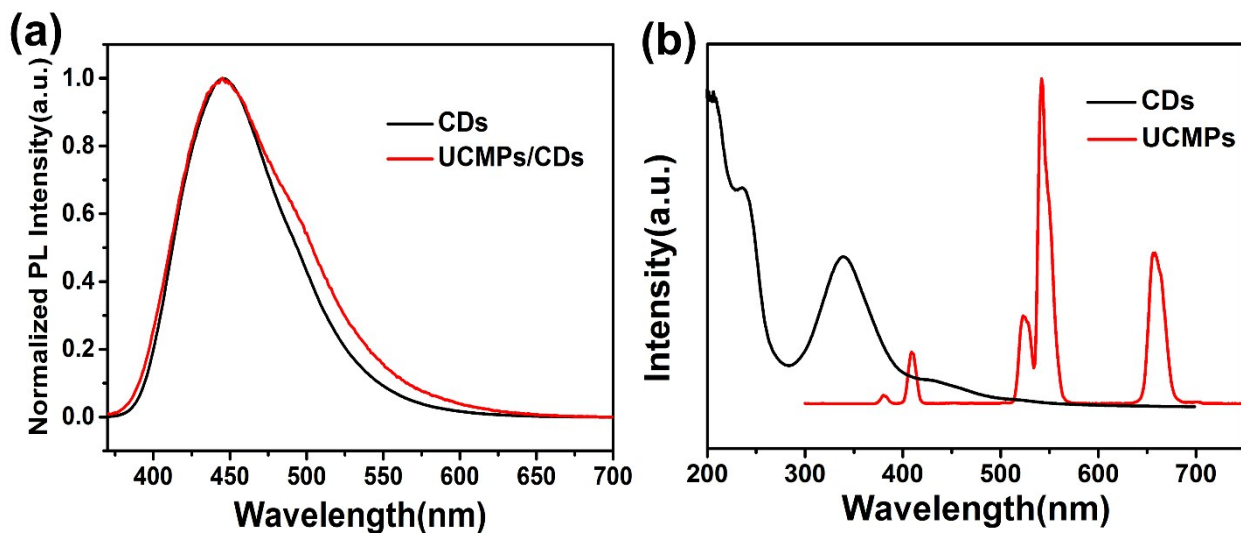

**Figure S5** The DC fluorescence spectra of CDs and UCMPs/CDs (a), and the absorption spectra (black line) of CDs and UC PL spectra (red line) of UCMPs (b).

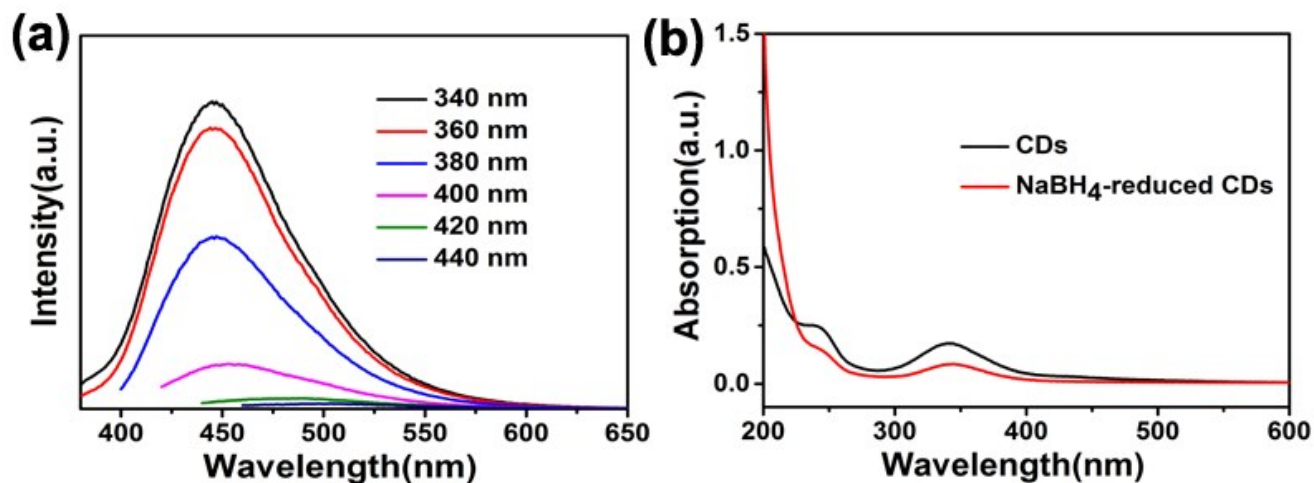

**Figure S6** The fluorescent spectra of NaBH<sub>4</sub>-reduced CDs solution (a); and UV–visible absorption spectra (b).

For the reduction of the CDs, the process: sodium borohydride (NaBH<sub>4</sub>, 0.05 g) is mixed with an aqueous solution of CDs (0.01 mg/ml, 15 ml), and then stirred for 18 hours at room temperature. The redundant sodium borohydride is removed by dialysis treatment.

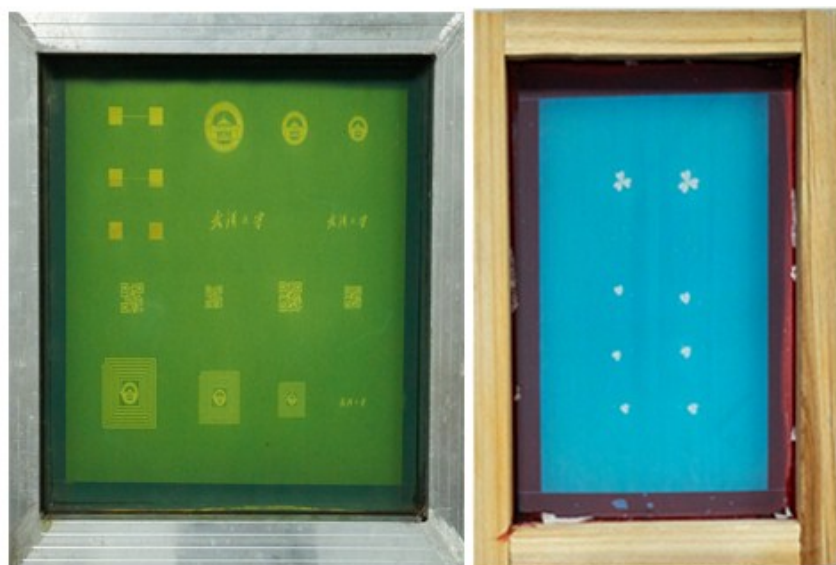

**Figure S7** The photographs of screen printing plates.
